# Supplementary material for: Fluvirucins B7–B10, new antifungal macrolactams from a marine-derived Nonomuraea sp. MYH522
Source: Royal Society of Chemistry journal article supplement (doi:10.1039/d2ra01701f), 2022-01-01

## Electronic Supplementary Information (ESI)

### **Fluvirucins B7-B<sub>10</sub>, New Antifungal Macrolactams from a Marine-Derived *Nonomuraea* sp. MYH522**

Hai Yu,<sup>a</sup> Shuo Chen,<sup>a</sup> Hongji Li,<sup>a</sup> Ruina Wang,<sup>a</sup> Yuanying Jiang,<sup>b</sup> Lan Yan<sup>\*a</sup> and Peng Sun<sup>\*ab</sup>

<sup>a</sup> School of Pharmacy, Naval Medical University, 325 Guo-He Road, Shanghai 200433, People's Republic of China, sunpeng78@126.com (P.S.); ylansmmu@sina.com (L.Y.).

<sup>b</sup> Tongji University School of Medicine, 1239 Siping Road, Shanghai, People's Republic of China.

## Table of Content

|                                                                                                                                                              |    |
|--------------------------------------------------------------------------------------------------------------------------------------------------------------|----|
| Table S1. <sup>13</sup> C NMR Spectroscopic Data Comparison of Aglycon of B <sub>0</sub> /B <sub>9</sub> and Sch 39185/B <sub>3</sub> /B <sub>10</sub> ..... | 3  |
| Table S2. In vitro Antibacterial Activity of 1-5 (IC <sub>50</sub> , μg/mL). .....                                                                           | 3  |
| Figure S1. Select NOE correlations of 2.....                                                                                                                 | 3  |
| Figure S2. MS and NMR spectra of 2.....                                                                                                                      | 4  |
| Figure S3. MS and NMR spectra of 3.....                                                                                                                      | 9  |
| Figure S4. MS and NMR spectra of 4.....                                                                                                                      | 14 |
| Figure S5. MS and NMR spectra of 5.....                                                                                                                      | 19 |

**Table S1.**  $^{13}\text{C}$  NMR Spectroscopic Data Comparison of Aglycon of B<sub>0</sub>/B<sub>9</sub> and Sch 39185/B<sub>3</sub>/B<sub>10</sub>.

|    | B <sub>0</sub> <sup>a</sup> | B <sub>9</sub> <sup>a</sup> | $\Delta^{13}\text{C}$ | Sch 39185/B <sub>3</sub> <sup>b</sup> | B <sub>10</sub> <sup>a</sup> | $\Delta^{13}\text{C}$ |
|----|-----------------------------|-----------------------------|-----------------------|---------------------------------------|------------------------------|-----------------------|
| 1  | 179.0                       | 178.9                       | 0.1                   | 178.2                                 | 178.9                        | -0.7                  |
| 2  | 51.1                        | 50.9                        | 0.2                   | 50.9                                  | 51.2                         | -0.3                  |
| 3  | 34.0                        | 34.1                        | -0.1                  | 33.9                                  | 34.6                         | -0.7                  |
| 4  | 26.4                        | 26.5                        | -0.1                  | 25.5                                  | 26.3                         | -0.8                  |
| 5  | 27.7                        | 27.9                        | -0.2                  | 32.6                                  | 33.4                         | -0.8                  |
| 6  | 27.6                        | 27.8                        | -0.2                  | 39.2                                  | 39.8                         | -0.6                  |
| 7  | 27.2                        | 27.2                        | 0.0                   | 22.7                                  | 23.2                         | -0.5                  |
| 8  | 19.8                        | 20.0                        | -0.2                  | 21.8                                  | 22.6                         | -0.8                  |
| 9  | 78.7                        | 78.4                        | 0.3                   | 77.6                                  | 78.5                         | -0.9                  |
| 10 | 42.3                        | 42.3                        | 0.0                   | 41.2                                  | 42.0                         | -0.8                  |
| 11 | 26.1                        | 26.2                        | -0.1                  | 25.6                                  | 26.3                         | -0.7                  |
| 12 | 28.5                        | 28.6                        | -0.1                  | 28.1                                  | 28.7                         | -0.6                  |
| 13 | 39.7                        | 39.7                        | 0.0                   | 39.2                                  | 39.7                         | -0.5                  |
| 15 | 22.1                        | 22.2                        | -0.1                  | 21.6                                  | 22.0                         | -0.4                  |
| 16 | 9.2                         | 9.3                         | -0.1                  | 9.0                                   | 9.2                          | -0.2                  |
| 17 | 27.6                        | 27.7                        | -0.1                  | 26.9                                  | 27.5                         | -0.6                  |
| 18 | 12.4                        | 12.4                        | 0.0                   | 12.3                                  | 12.4                         | -0.1                  |
| 19 |                             |                             |                       | 27.7                                  | 28.2                         | -0.5                  |
| 20 |                             |                             |                       | 12.6                                  | 12.8                         | -0.2                  |

<sup>a</sup>CD<sub>3</sub>OD; <sup>b</sup>CD<sub>3</sub>OD/CDCl<sub>3</sub>

**Table S2.** In vitro Antibacterial Activity of **1-5** (IC<sub>50</sub>,  $\mu\text{g}/\text{mL}$ ).

| compounds | <i>S. aureus</i> | <i>E. Coli</i> |
|-----------|------------------|----------------|
| <b>1</b>  | >128             | >128           |
| <b>2</b>  | >128             | >128           |
| <b>3</b>  | >128             | >128           |
| <b>4</b>  | >128             | >128           |
| <b>5</b>  | >128             | >128           |
| kanamycin | 8                | 4              |

**Figure S1.** Select NOE correlations of **2**.

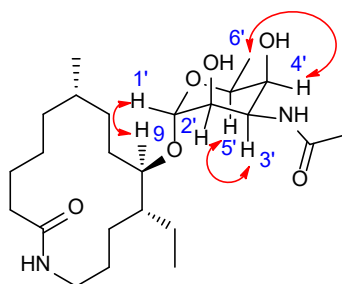

**Figure S2.** MS and NMR spectra of **2**

a) HRESIMS spectrum

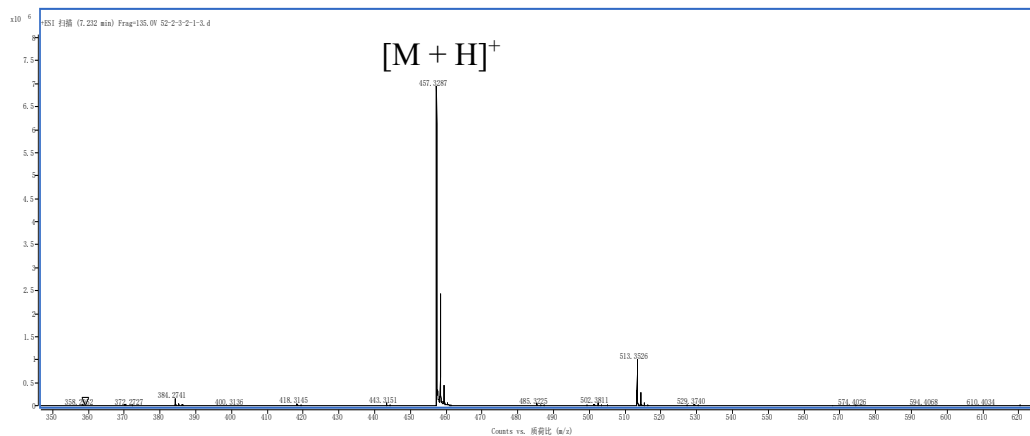

b)  $^1\text{H}$  NMR spectrum

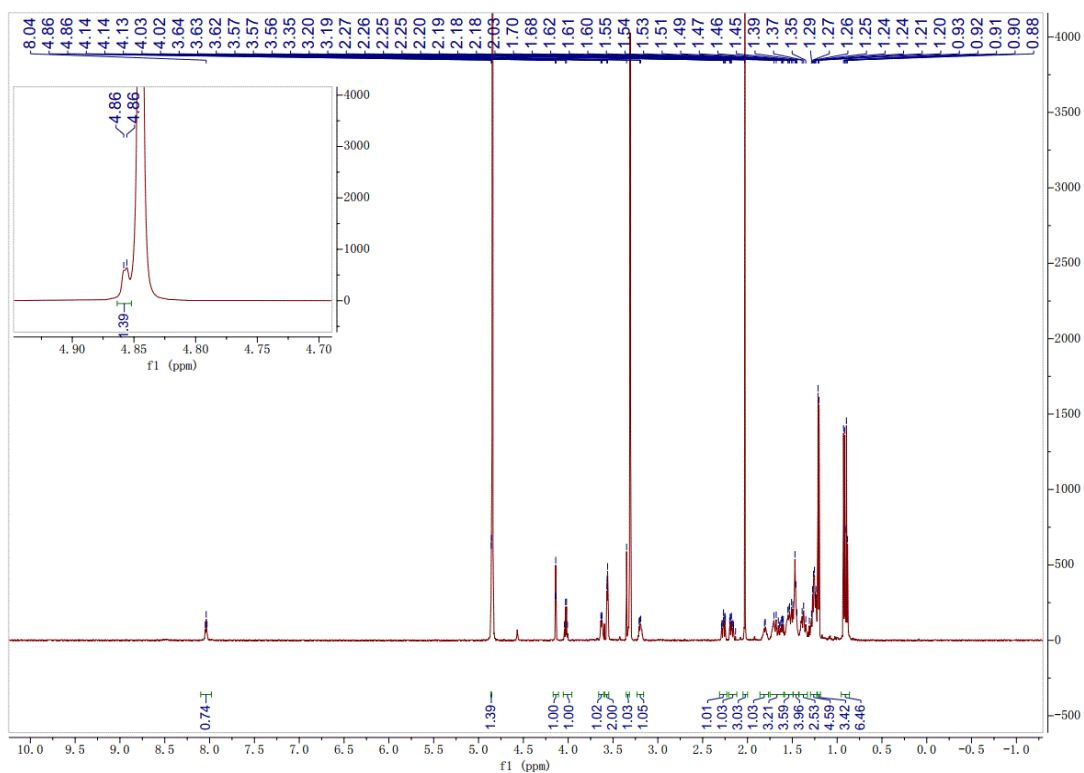

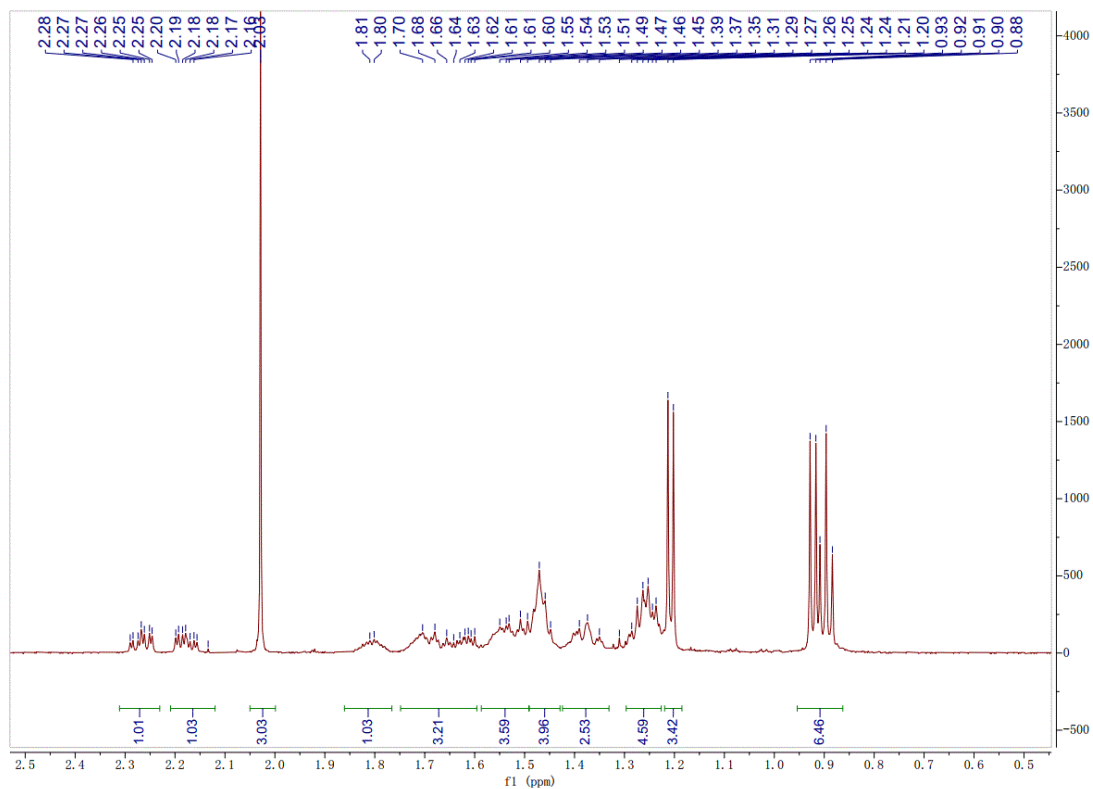

c)  $^{13}\text{C}$  NMR spectrum

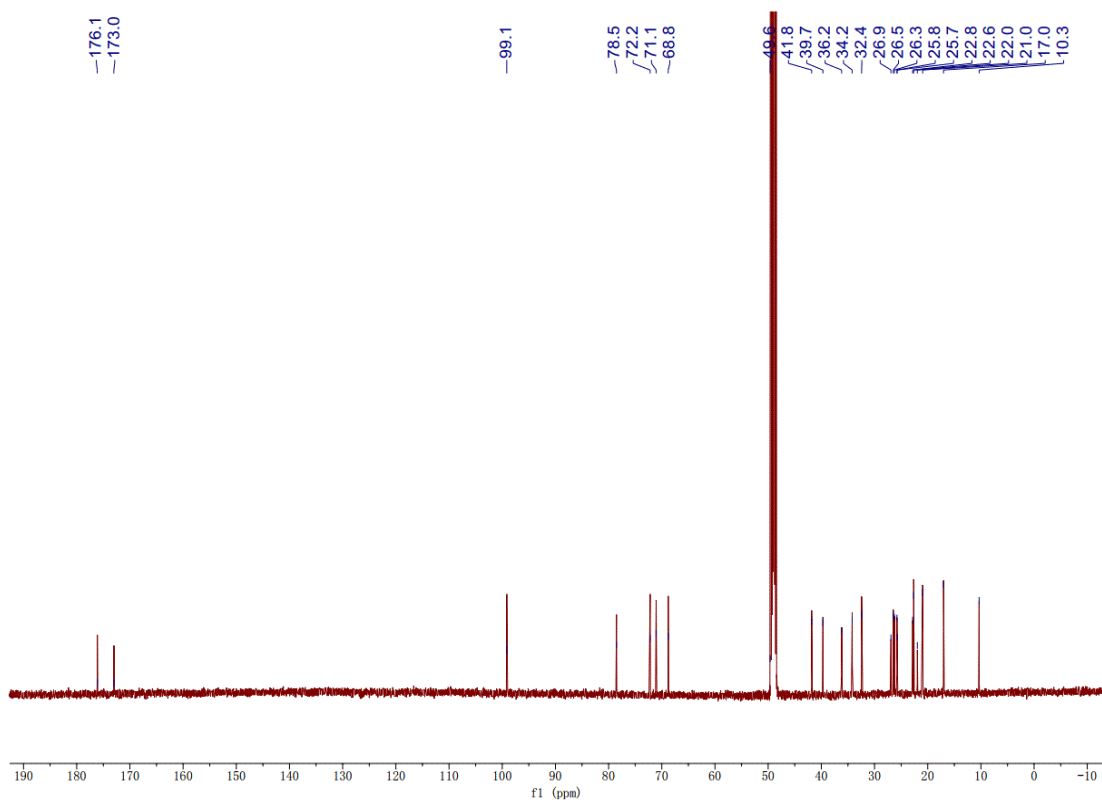

d) DEPT spectrum

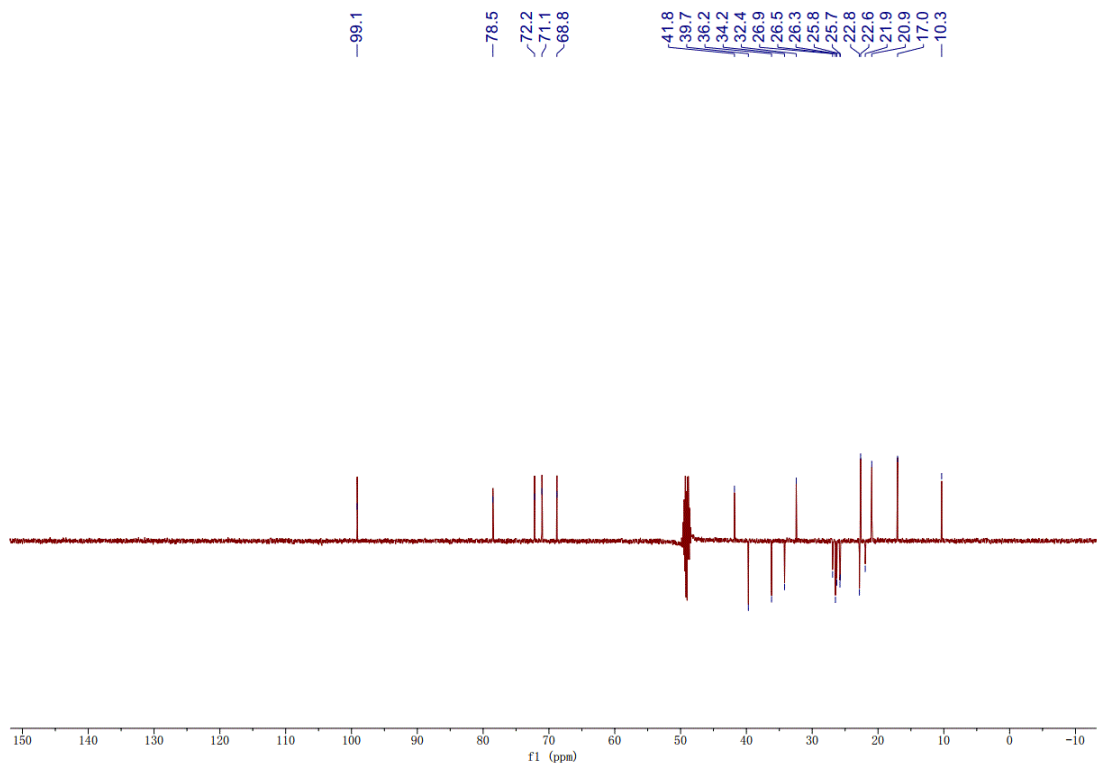

e) COSY spectrum

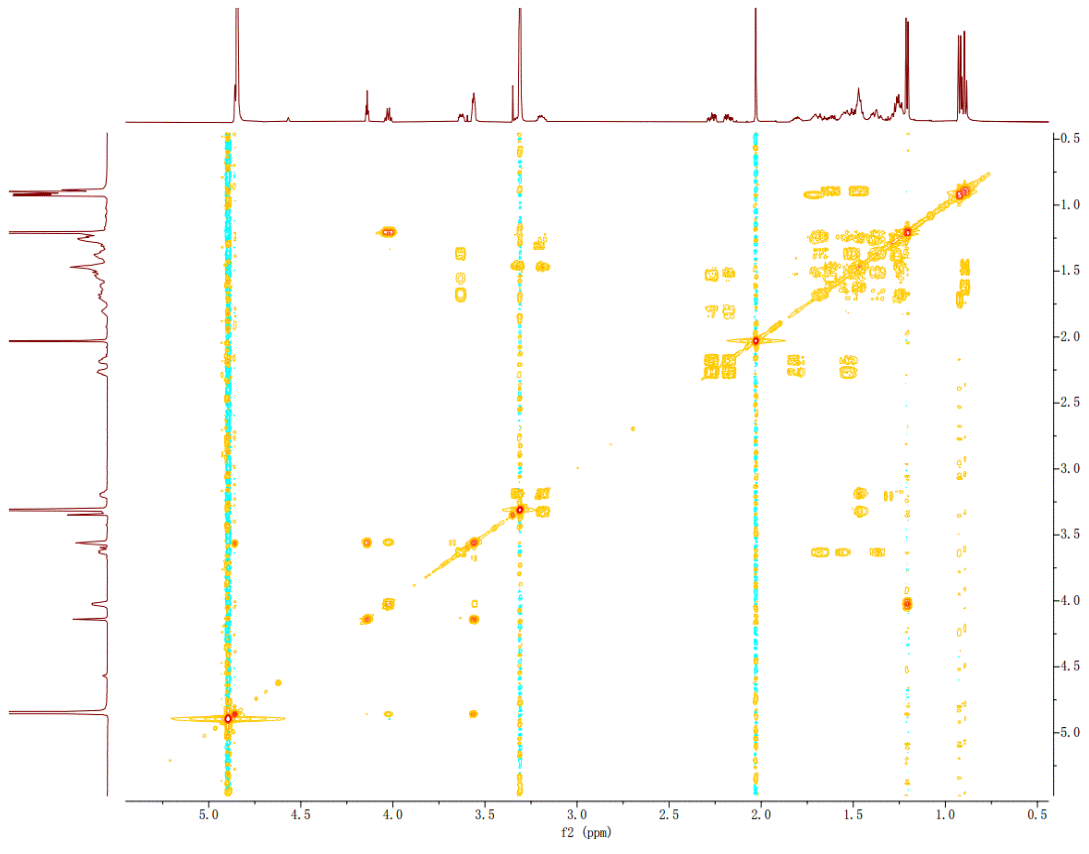

f) HMQC spectrum

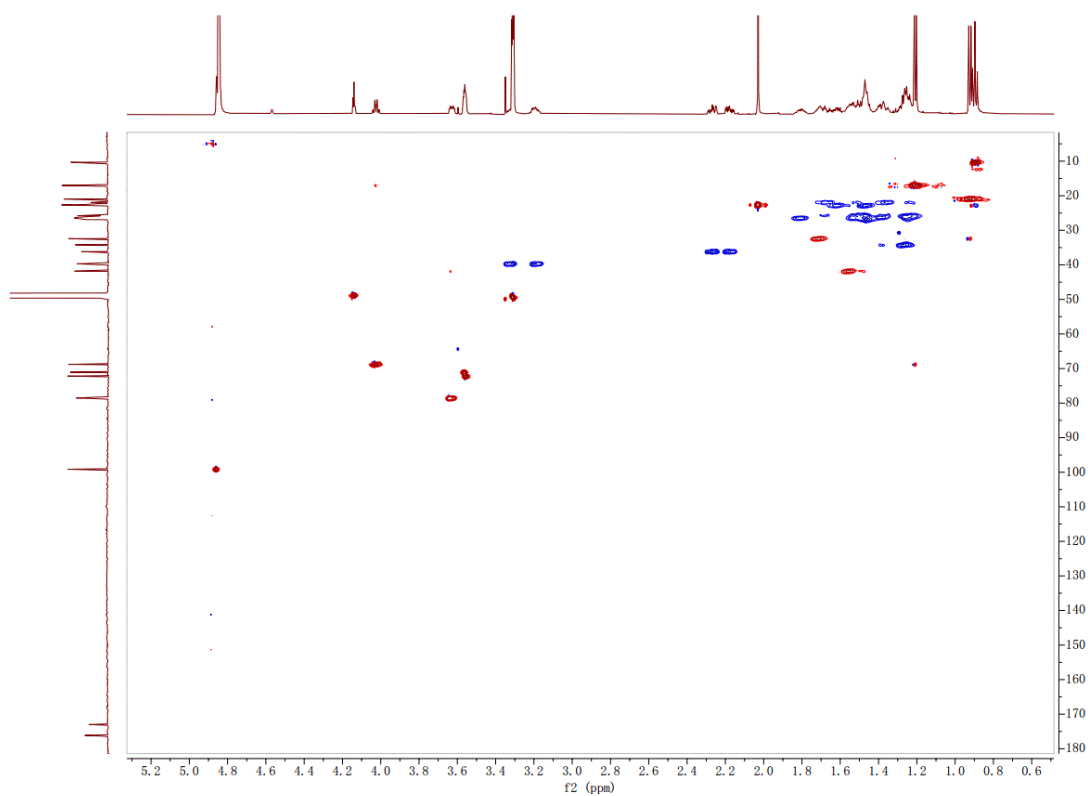

g) HMBC spectrum

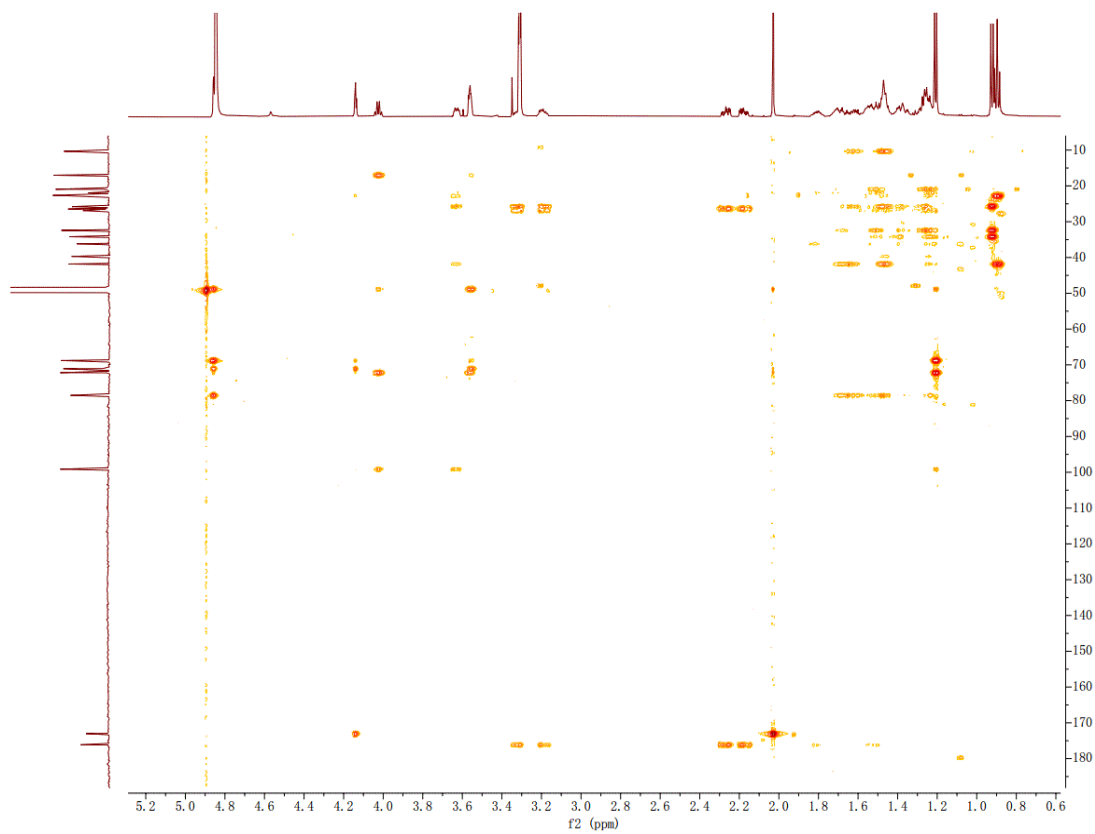

h) NOESY spectrum

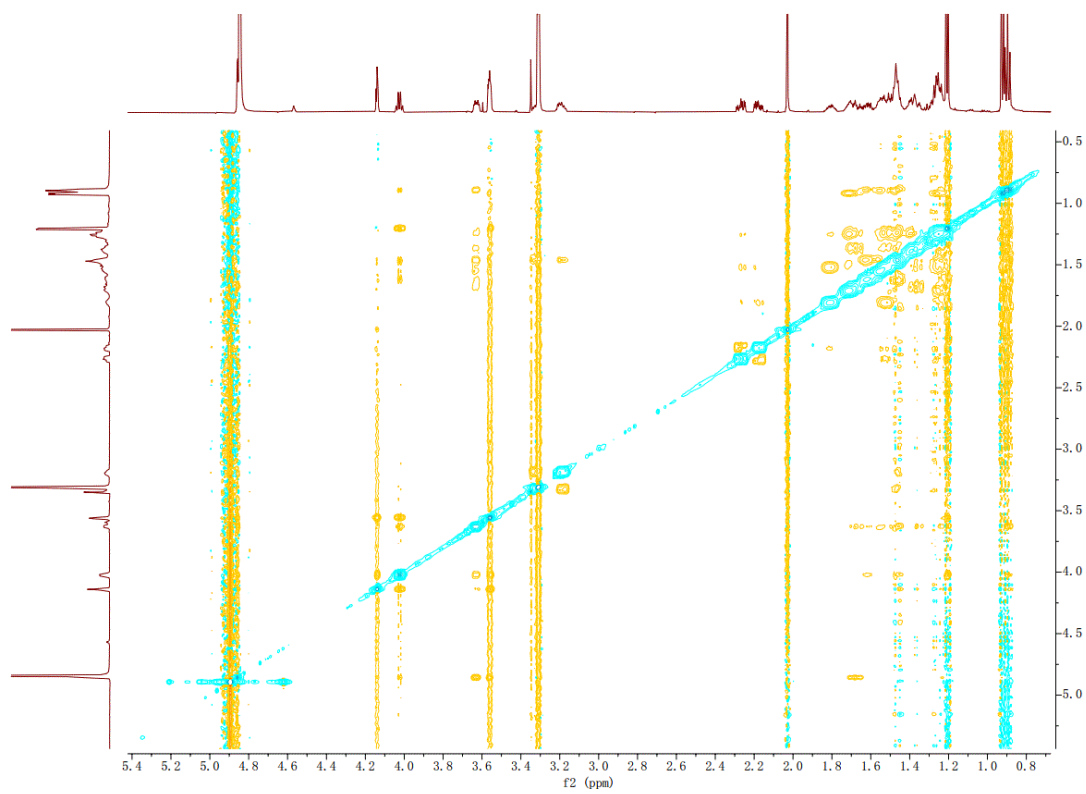



**Figure S3.** MS and NMR spectra of **3**

a) HRESIMS spectrum

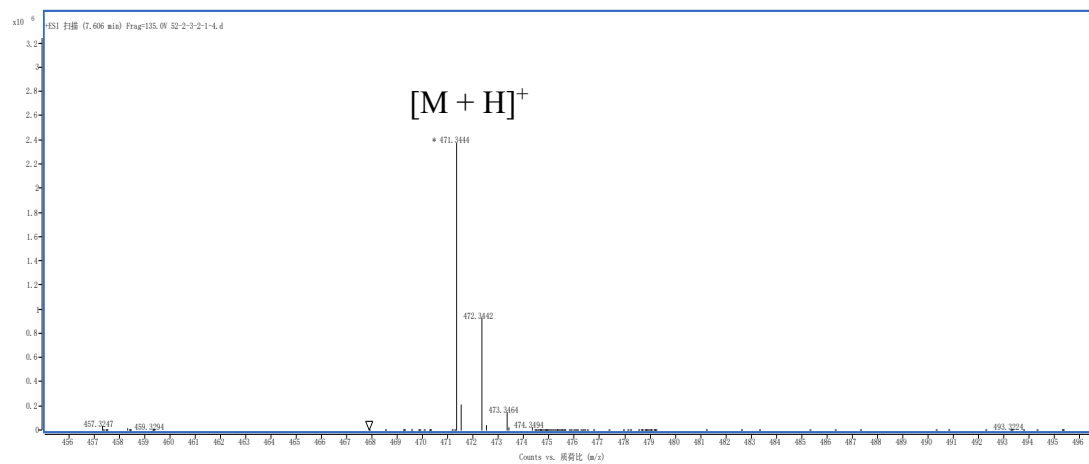

b) <sup>1</sup>H NMR spectrum

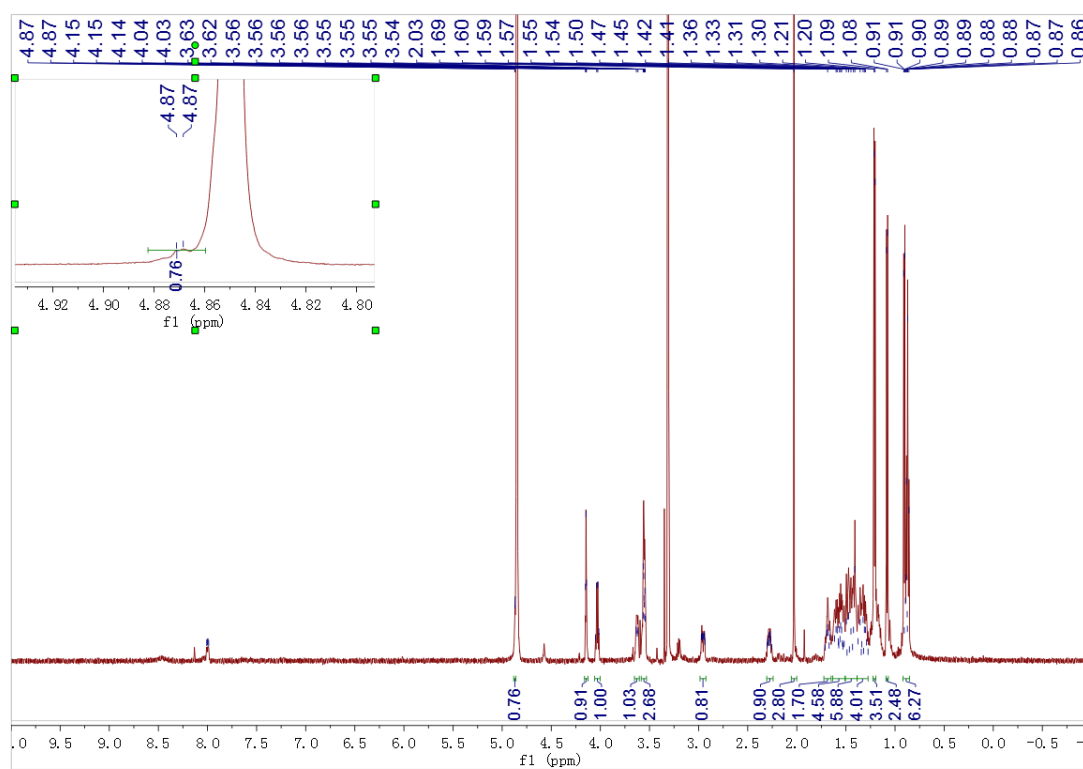

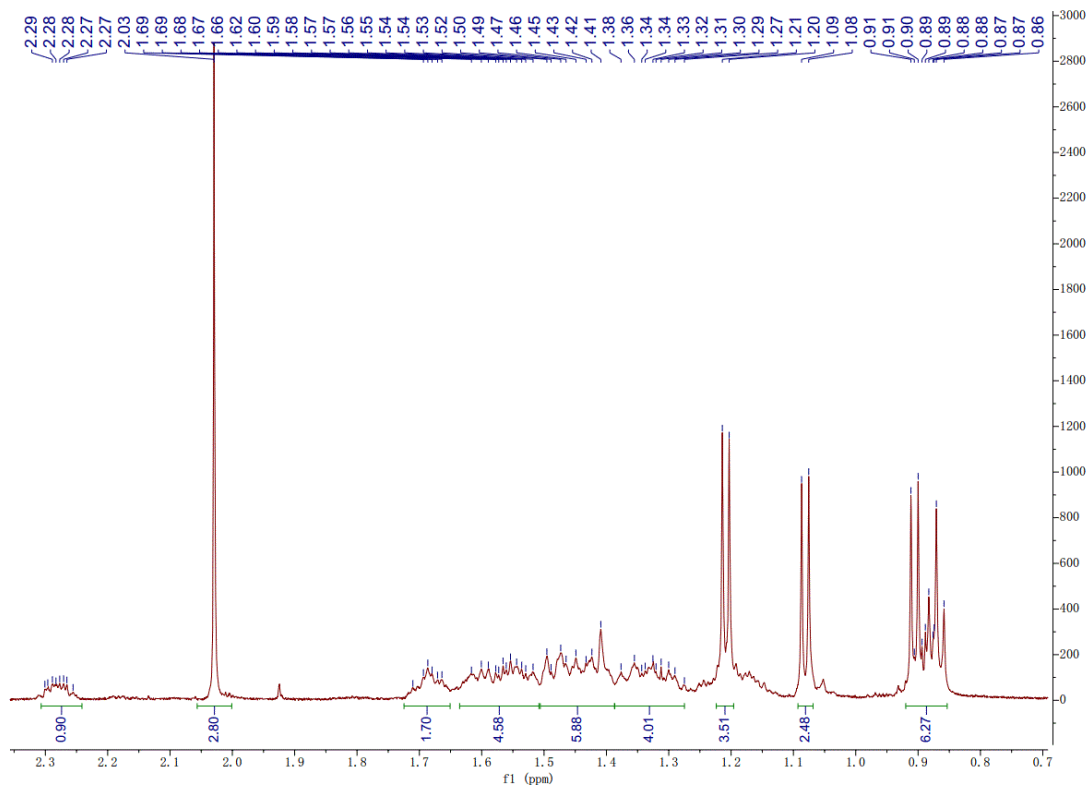

c)  $^{13}\text{C}$  NMR spectrum

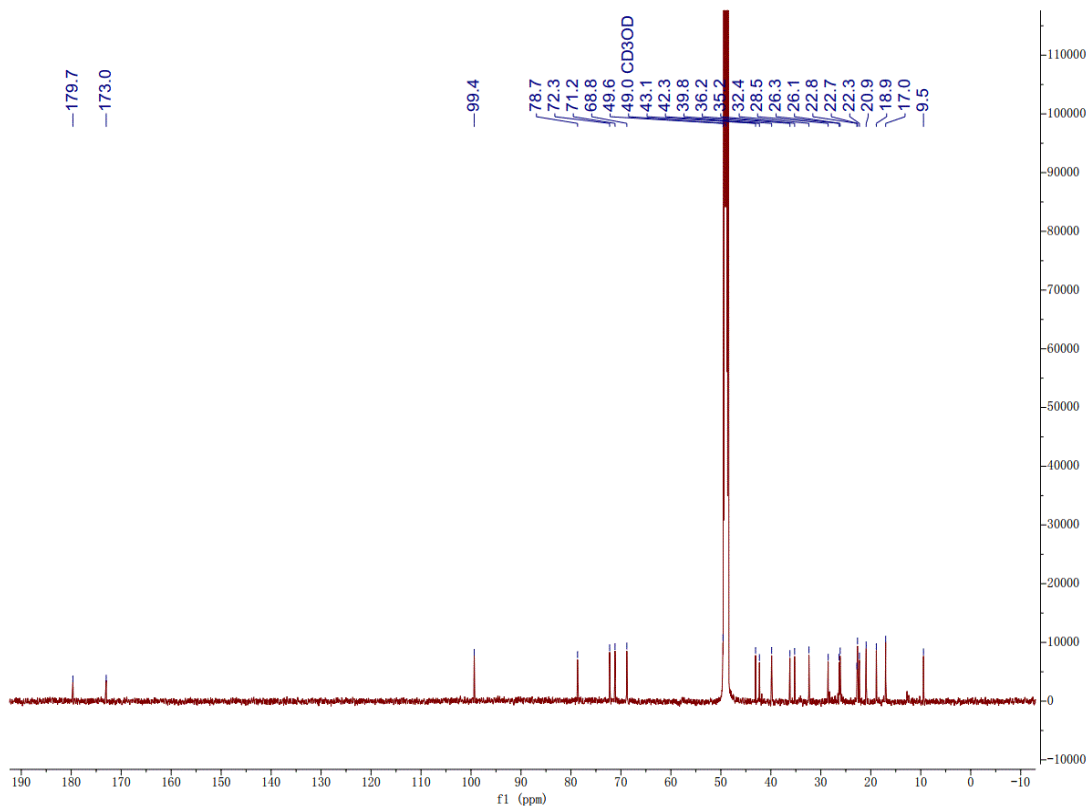

d) DEPT spectrum

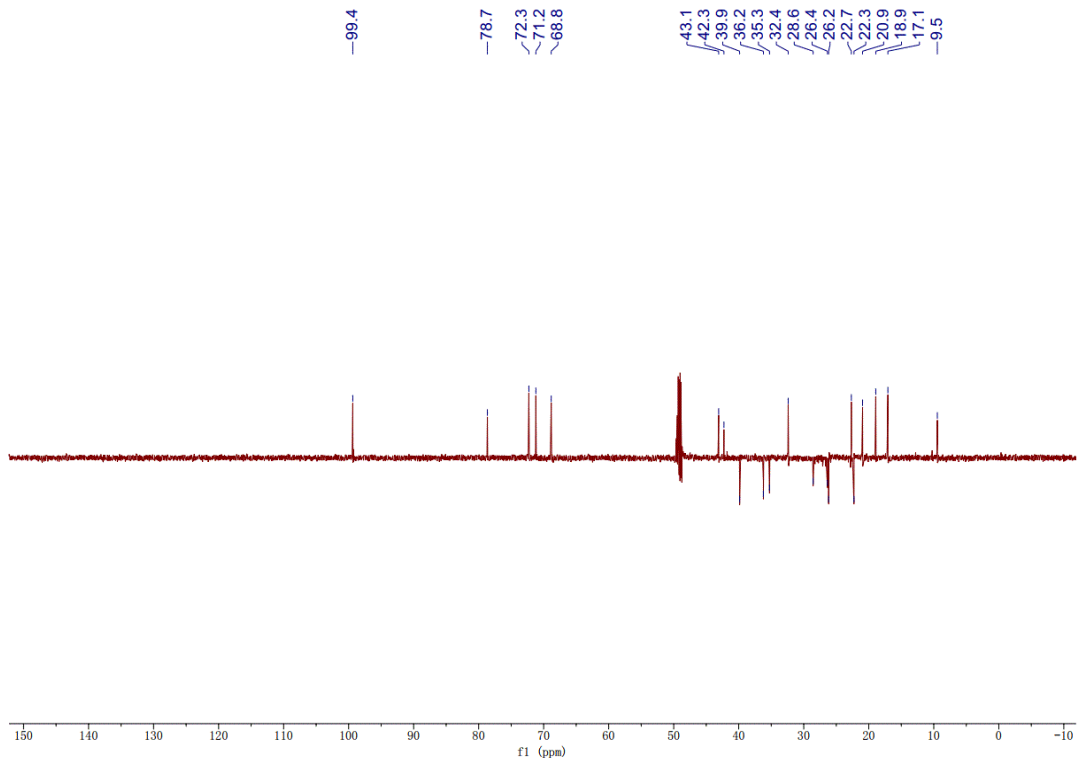

e) COSY spectrum

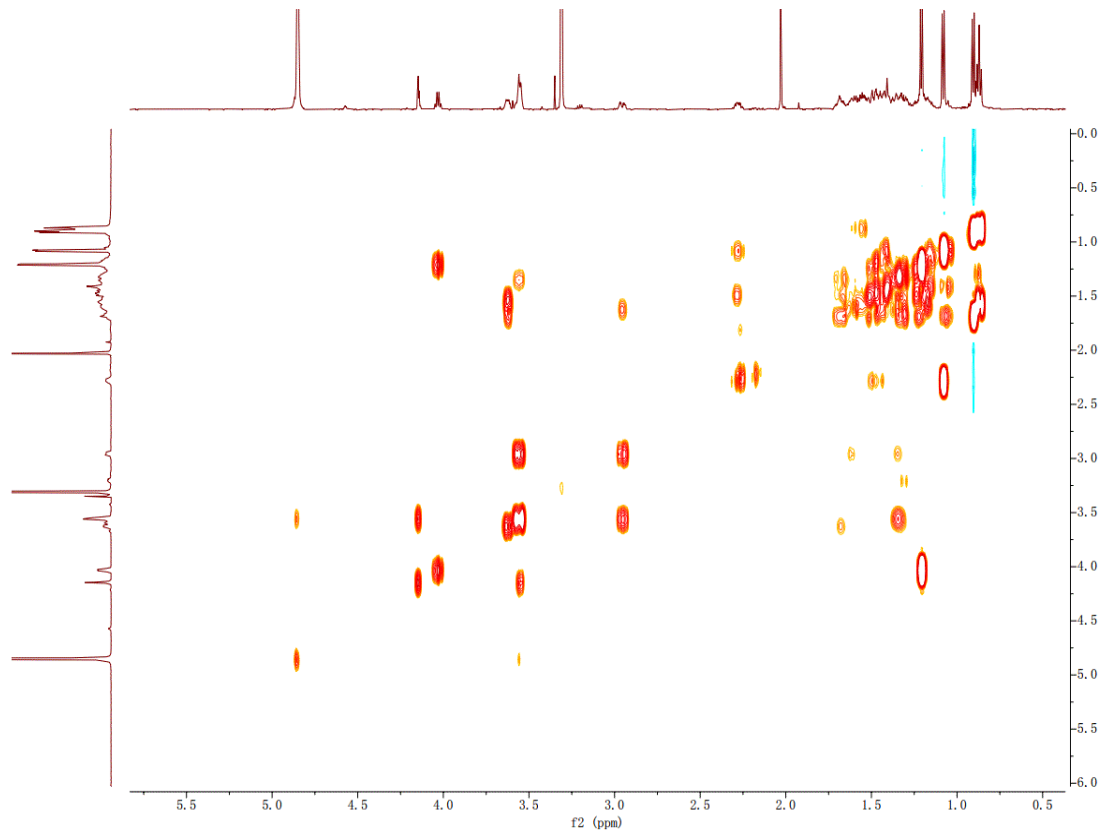

f) HMQC spectrum

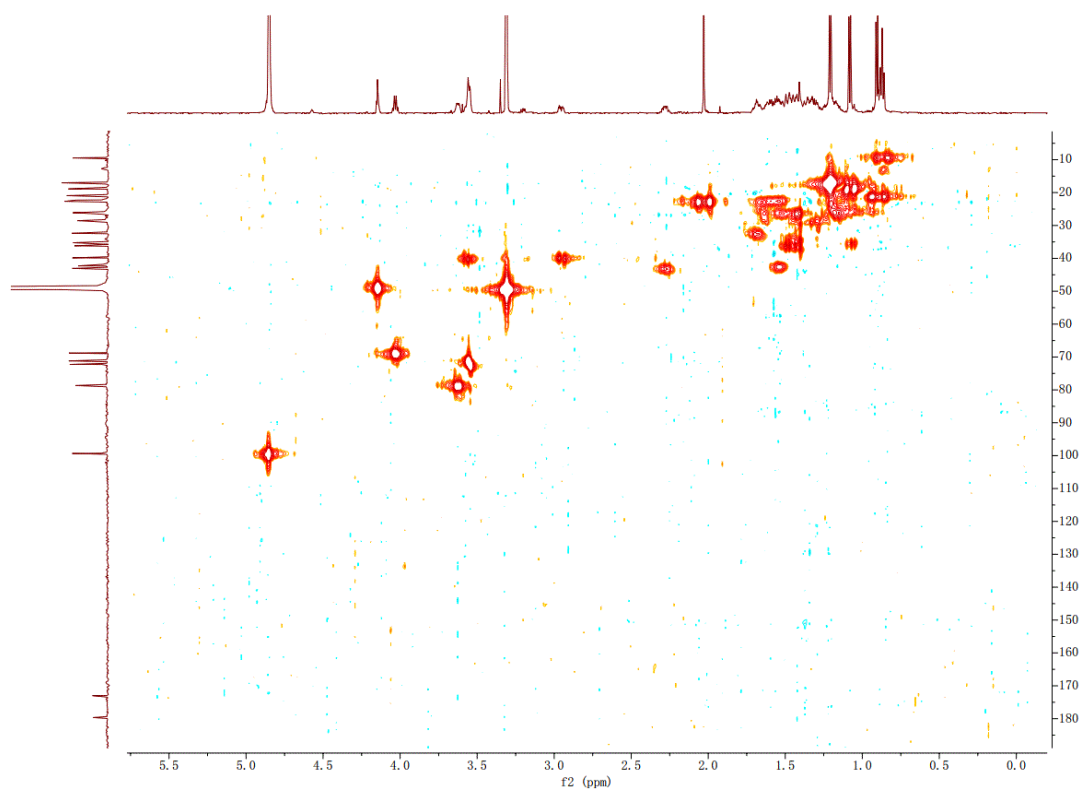

g) HMBC spectrum

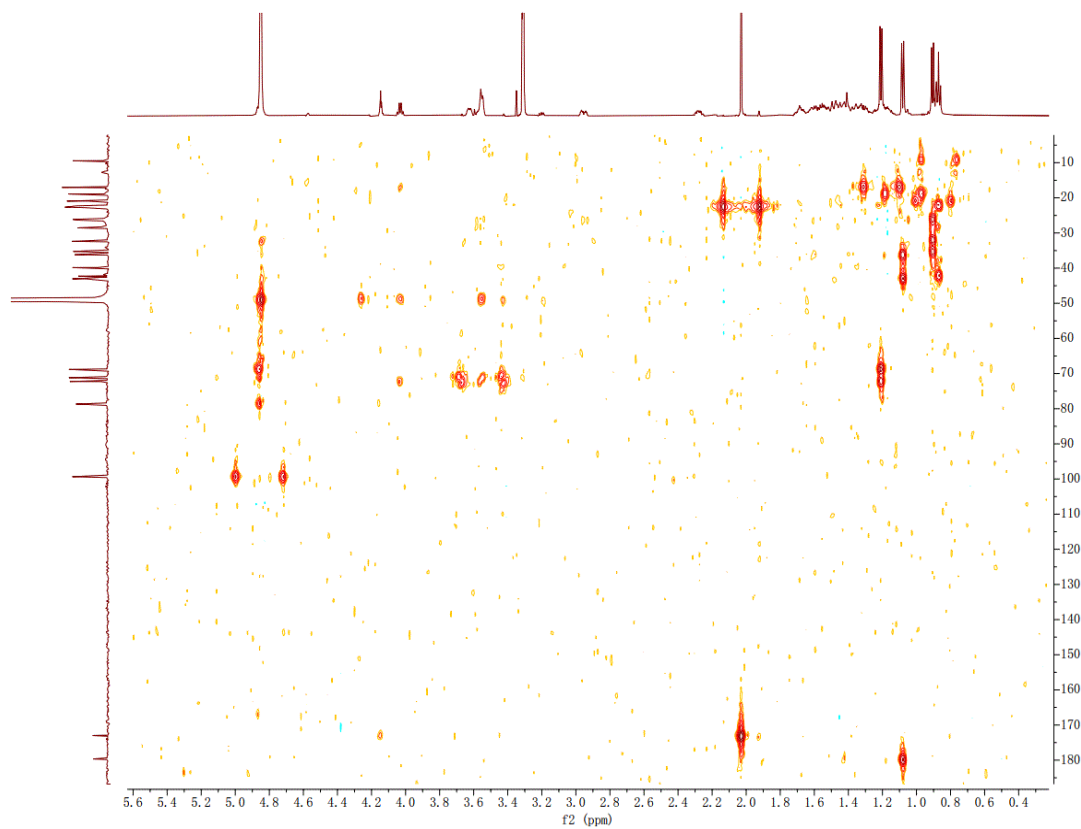

h) NOESY spectrum

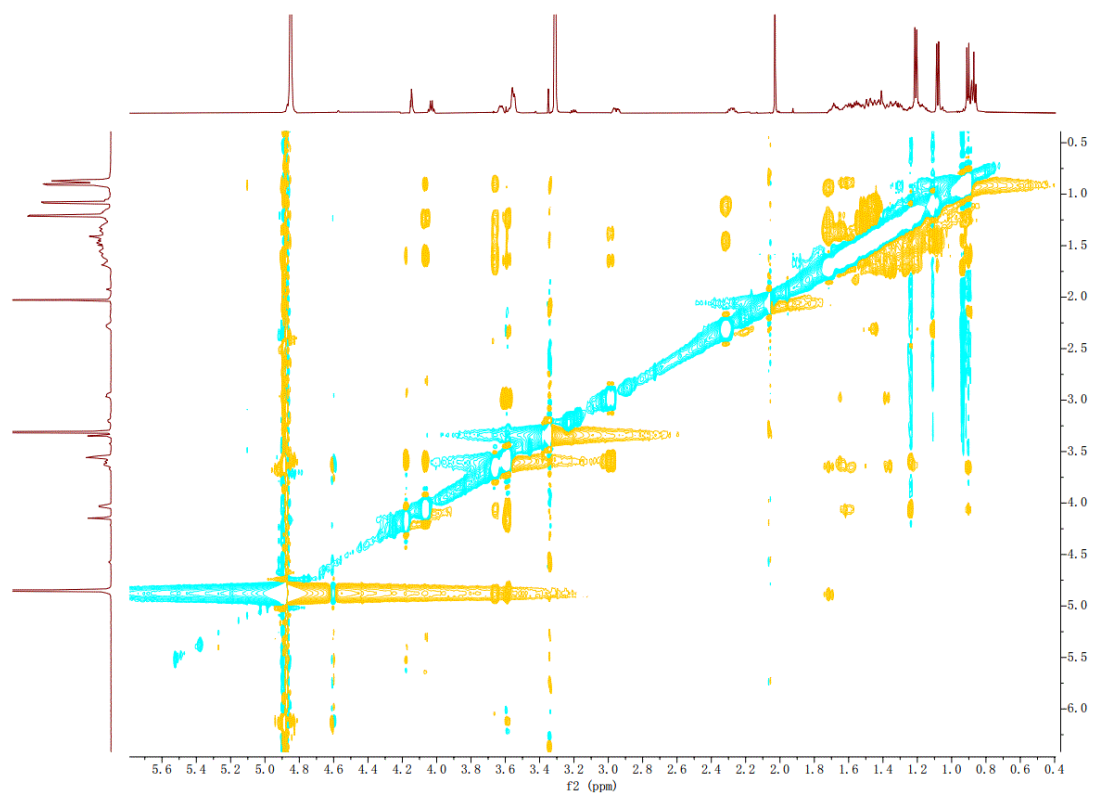

**Figure S4.** MS and NMR spectra of **4**

a) HRESIMS spectrum

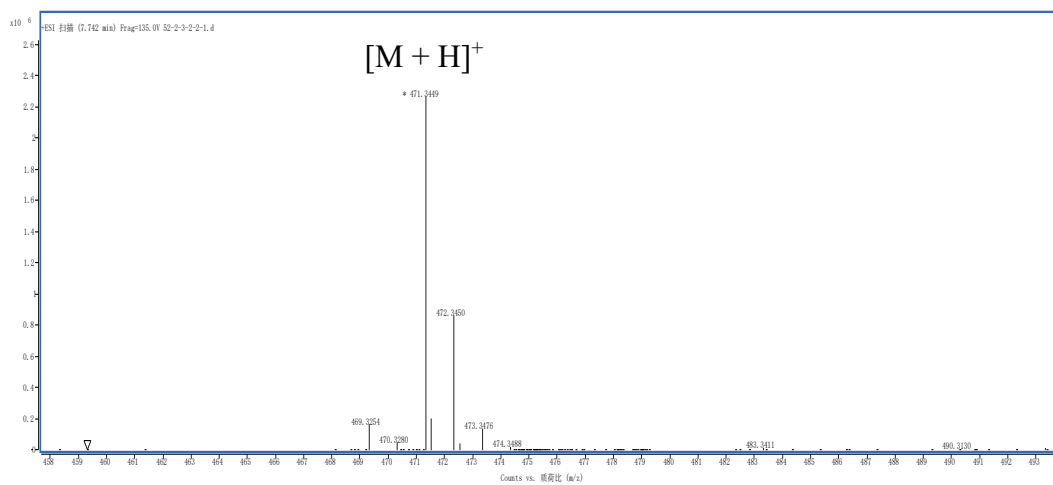

b) <sup>1</sup>H NMR spectrum

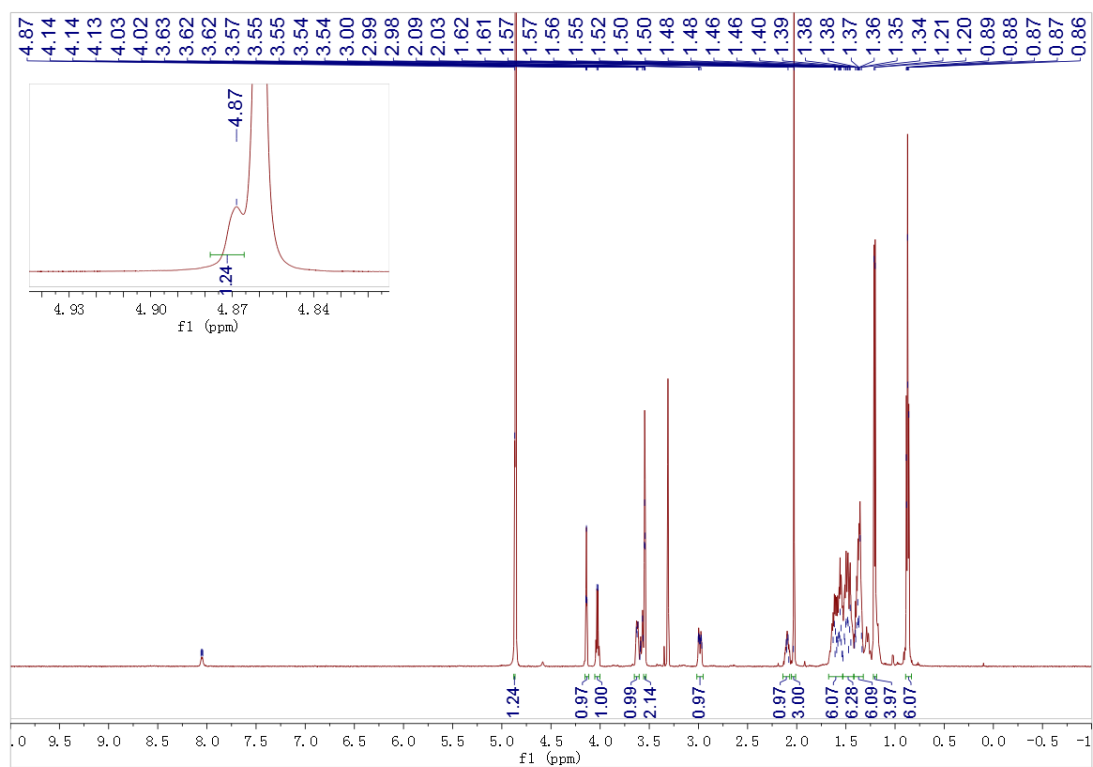

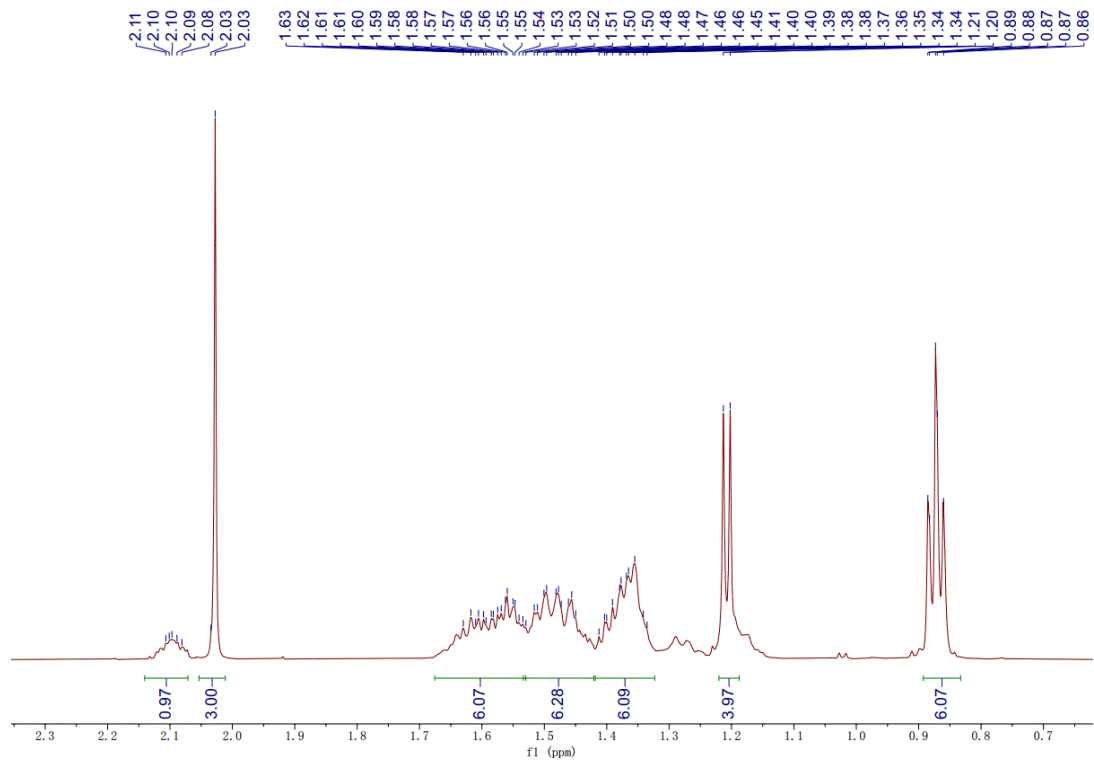

c)  $^{13}\text{C}$  NMR spectrum

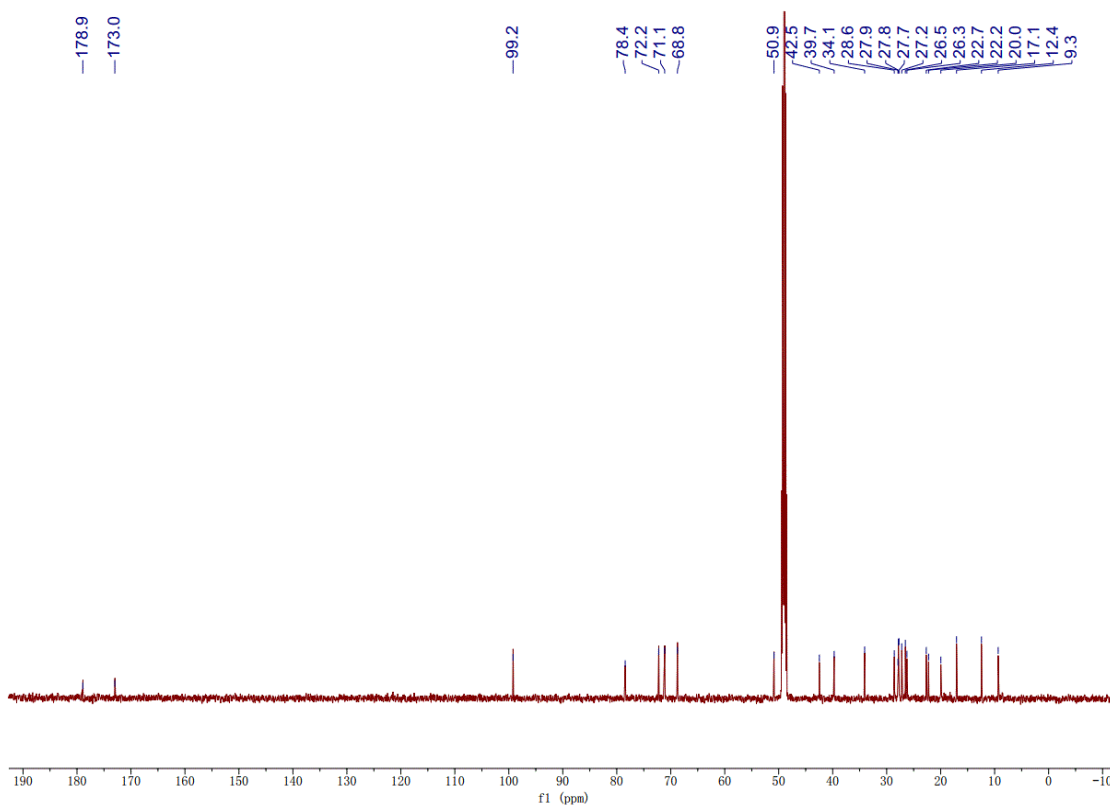

d) DEPT spectrum

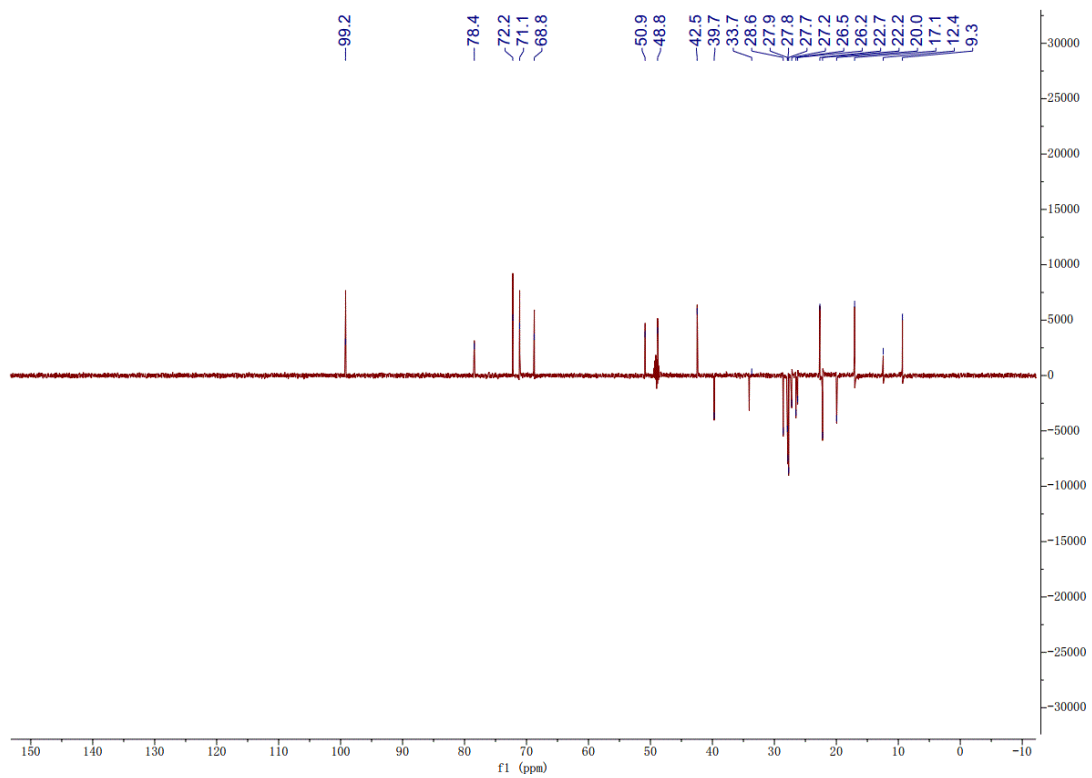

e) COSY spectrum

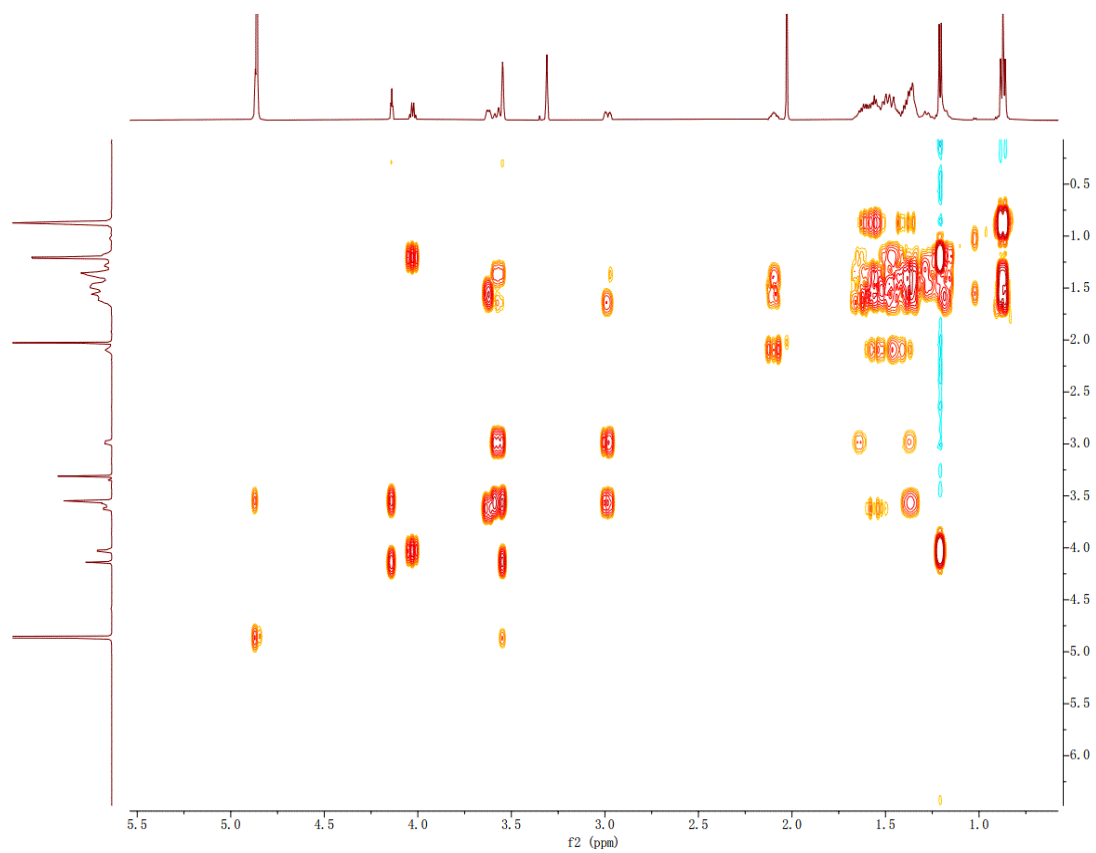



f) HMQC spectrum

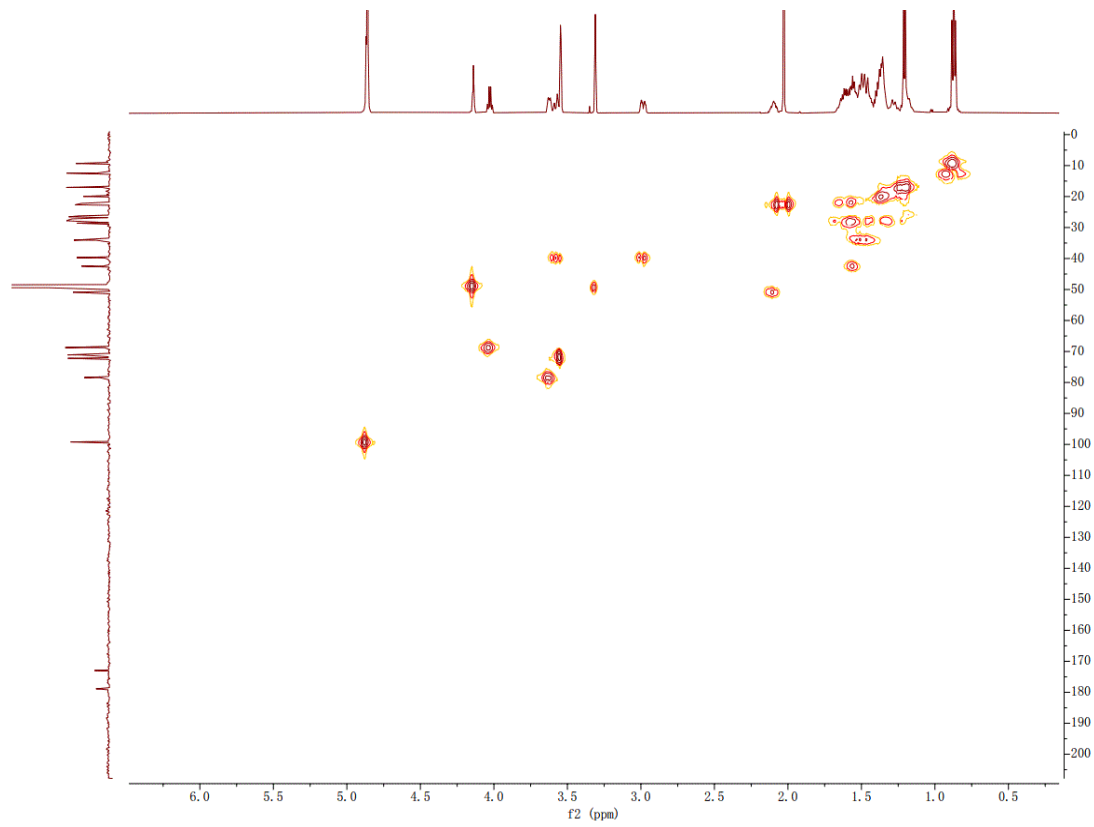

g) HMBC spectrum

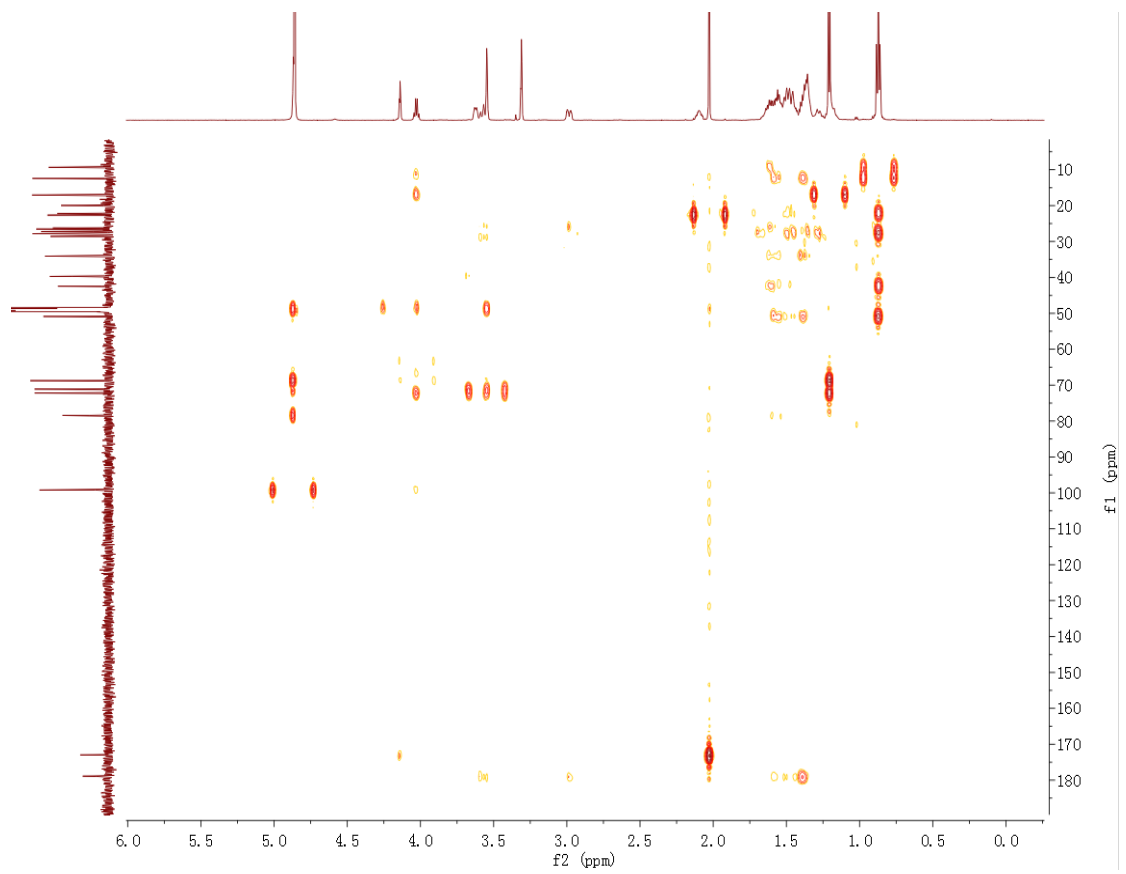

h) NOESY spectrum

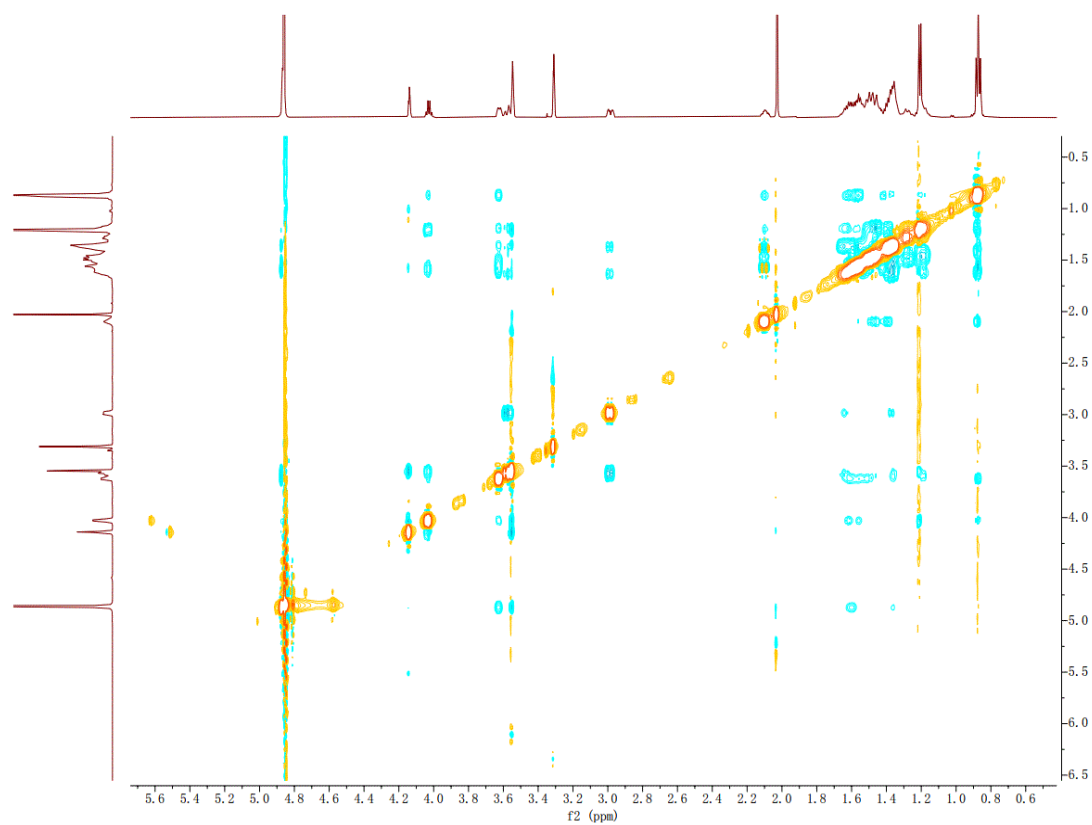

**Figure S5.** MS and NMR spectra of **5**

a) HRESIMS spectrum

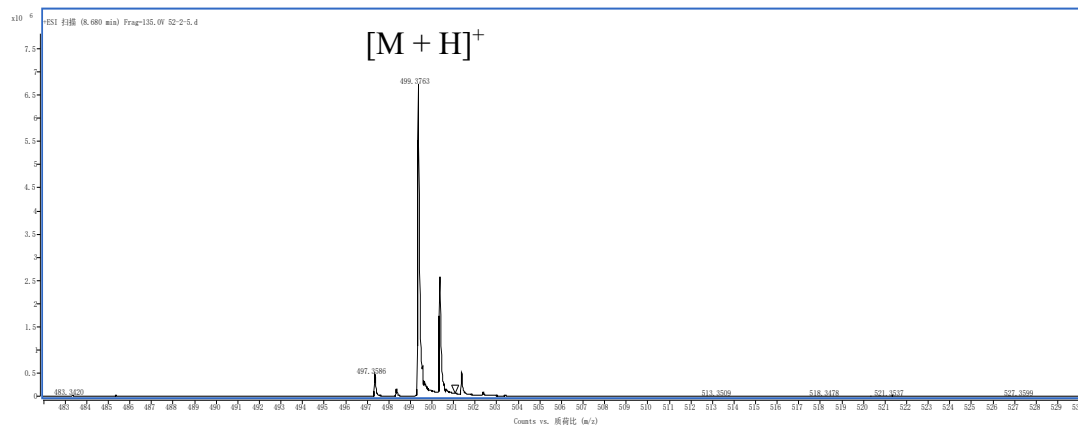

b)  $^1\text{H}$  NMR spectrum

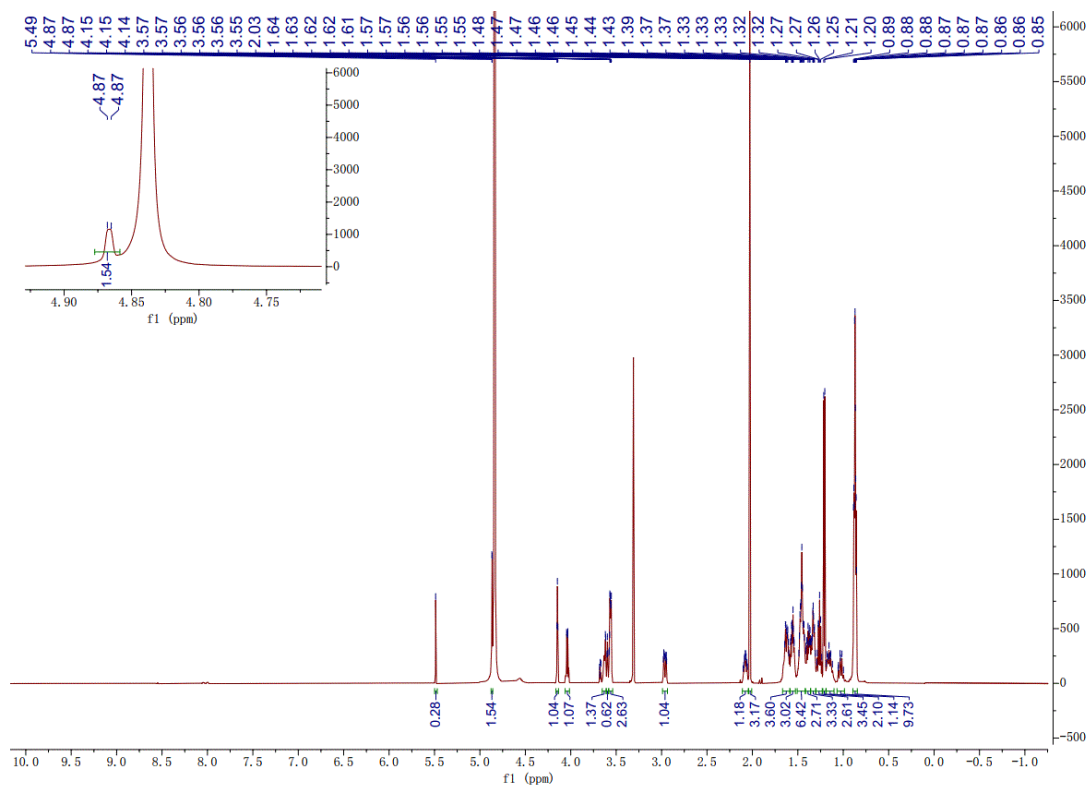

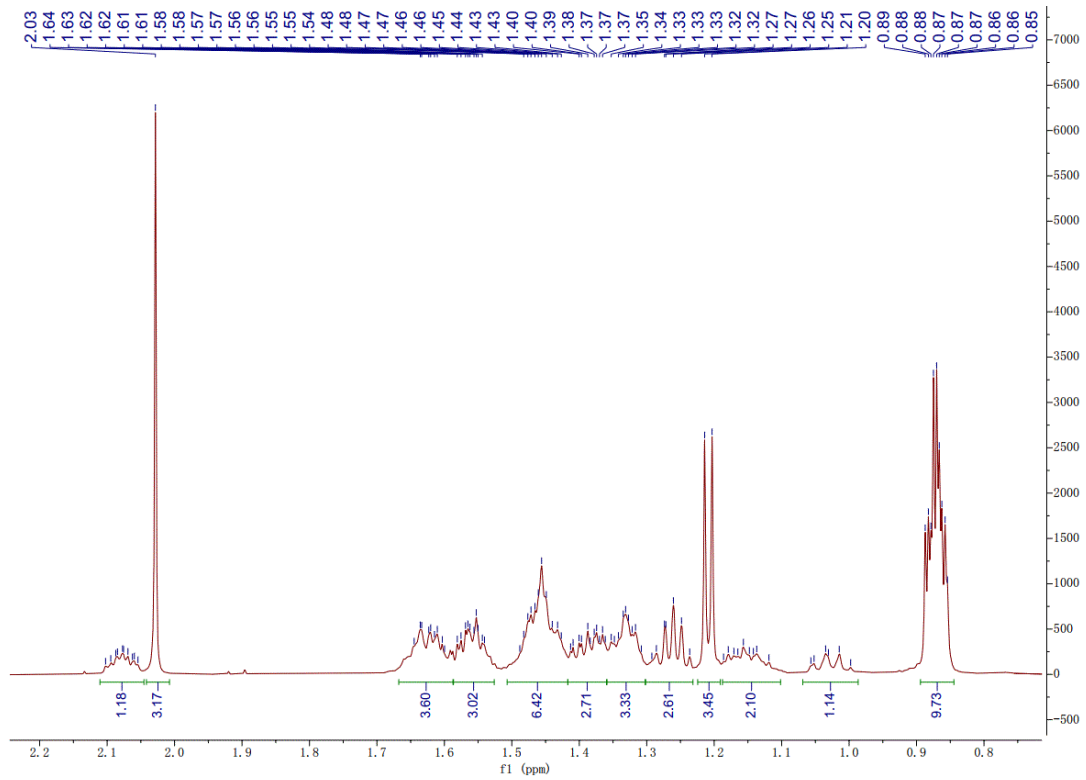

c)  $^{13}\text{C}$  NMR spectrum

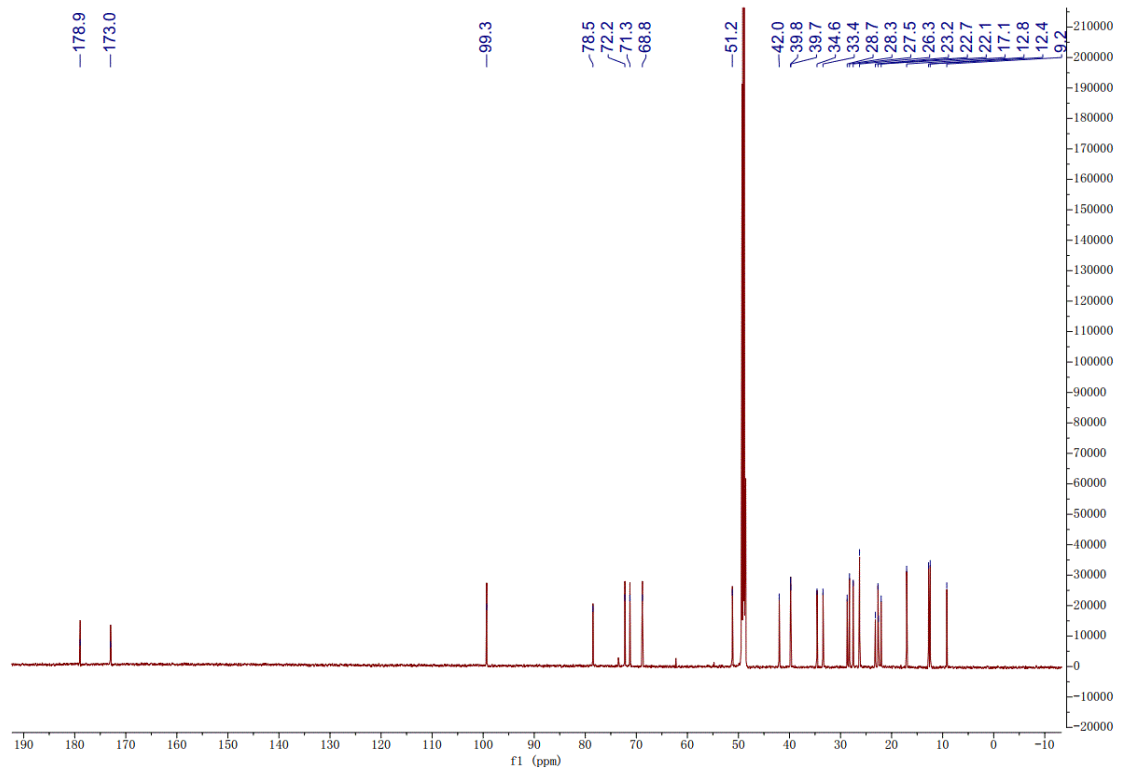

d) DEPT spectrum

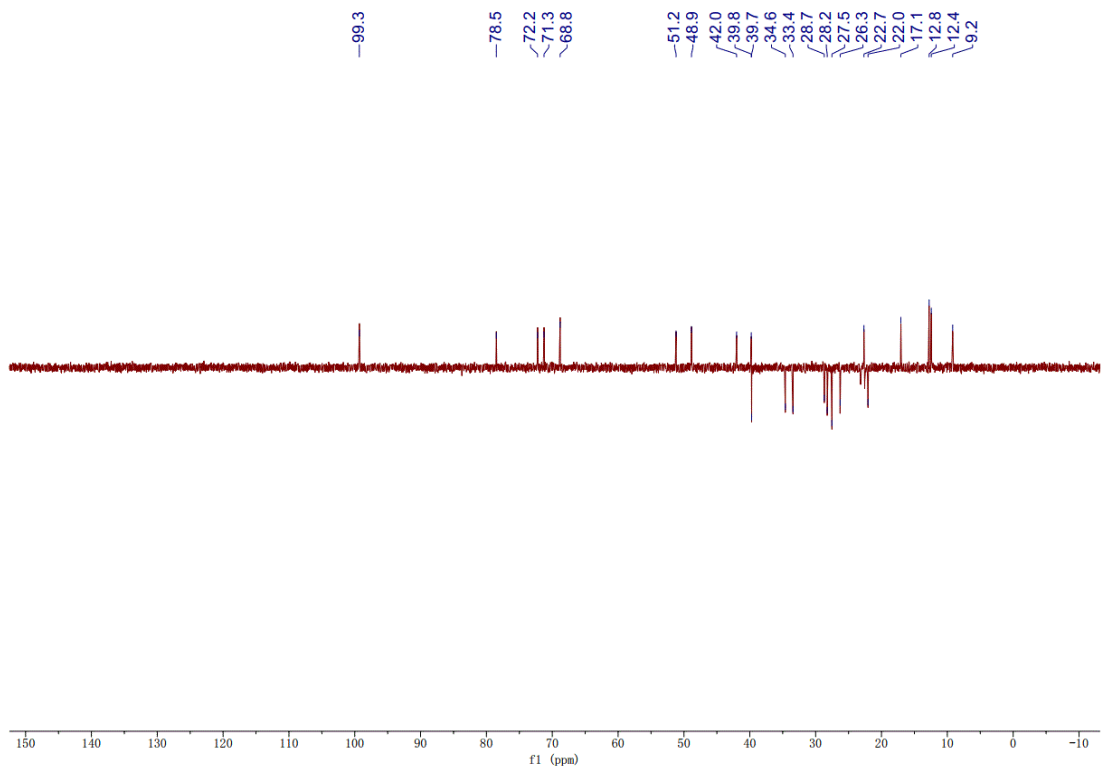

e) COSY spectrum

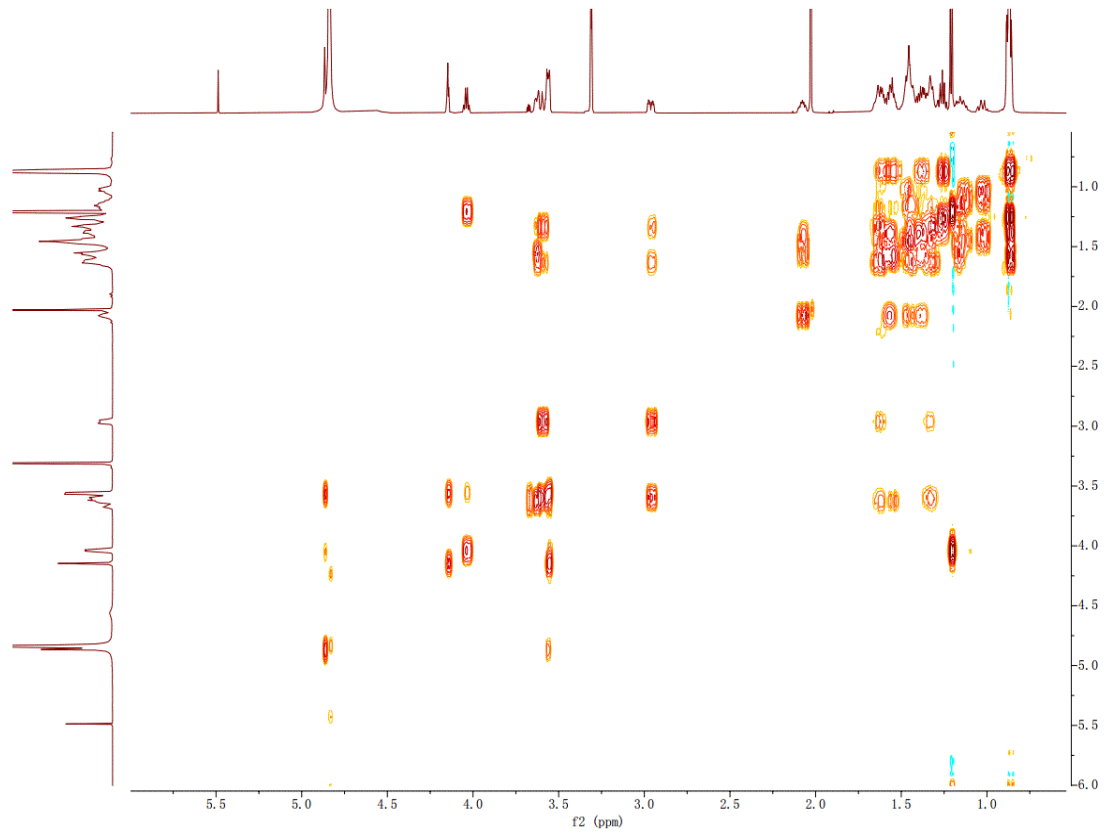

f) HMQC spectrum

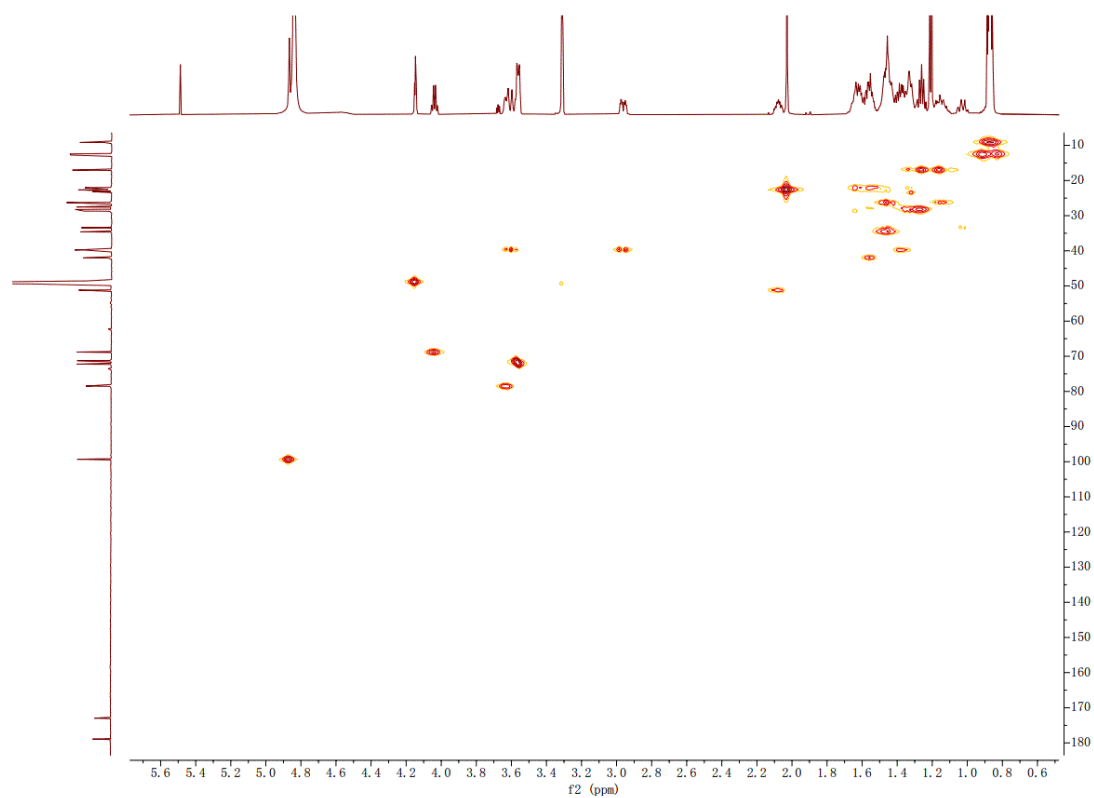

g) HMBC spectrum

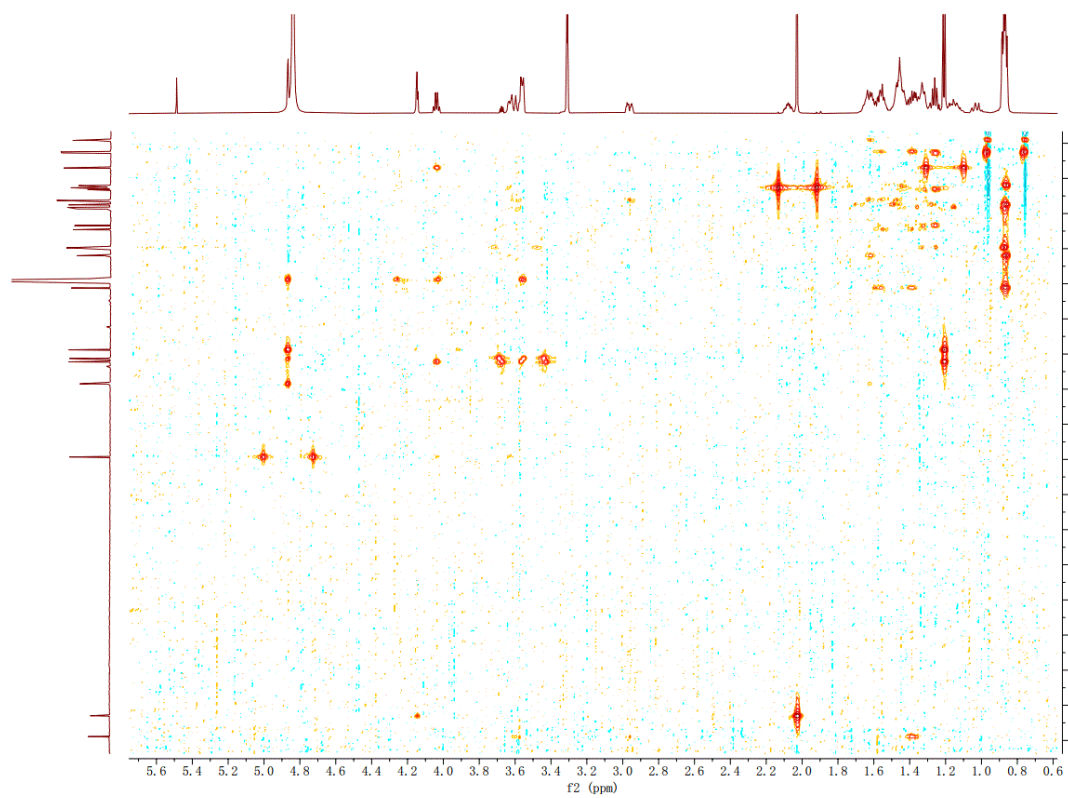

h) NOESY spectrum

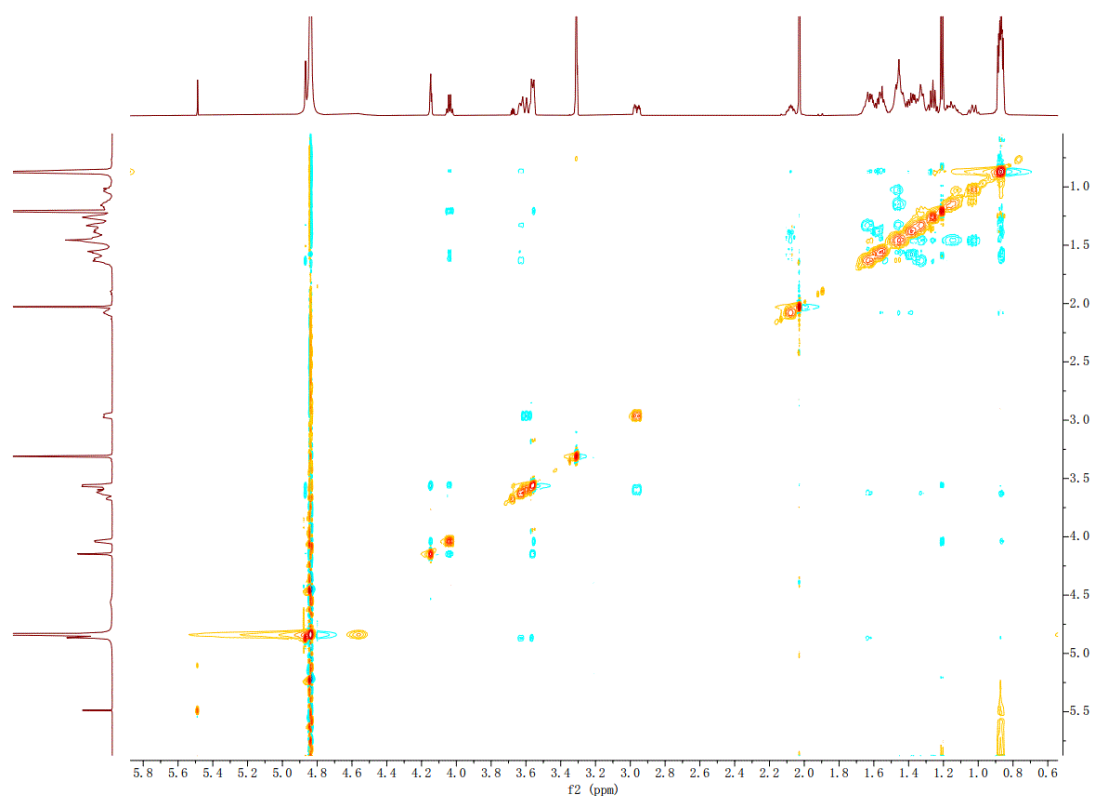

Supplement: d2ra01701f1.pdf [file d2ra01701f1.pdf]
